# Supplementary material for: Novel benzo[c][1,2,5]oxadiazole-naphthalenediimide based copolymer for high-performance air-stable n-type field-effect transistors exhibiting high electron mobility of 2.43 cm2 V−1 s−1
Source: Royal Society of Chemistry journal article supplement (doi:10.1039/c6tc05659h), 2017-01-01
Supplement: c6tc05659h1.pdf [file c6tc05659h1.pdf]

## *Supporting Information*

### **Novel Benzo[*c*][1,2,5]oxadiazole-Naphthalenediimide Based Copolymer for High-Performance Air-Stable *n*-Type Field-Effect Transistors Exhibiting High Electron Mobility of 2.43 cm<sup>2</sup> V<sup>-1</sup> s<sup>-1</sup>**

Zhiyuan Zhao,<sup>a,c</sup> Zhihong Yin,<sup>b</sup> Huajie Chen,<sup>\*b</sup> Yunlong Guo<sup>\*c</sup>, Qinxin Tang,<sup>\*a</sup> and Yunqi Liu<sup>\*c</sup>

<sup>a</sup>*Key Laboratory of UV-Emitting Materials and Technology under Ministry of Education, Northeast Normal University, Changchun 130024, P. R. China*

<sup>b</sup>*Key Laboratory of Advanced Functional Polymeric Materials of College of Hunan Province, Xiangtan University, Xiangtan 411105, P. R. China*

<sup>c</sup>*Beijing National Laboratory for Molecular Sciences, Chinese Academy of Sciences, Beijing 100190, P. R. China*

*\*Email - liuyq@iccas.ac.cn*

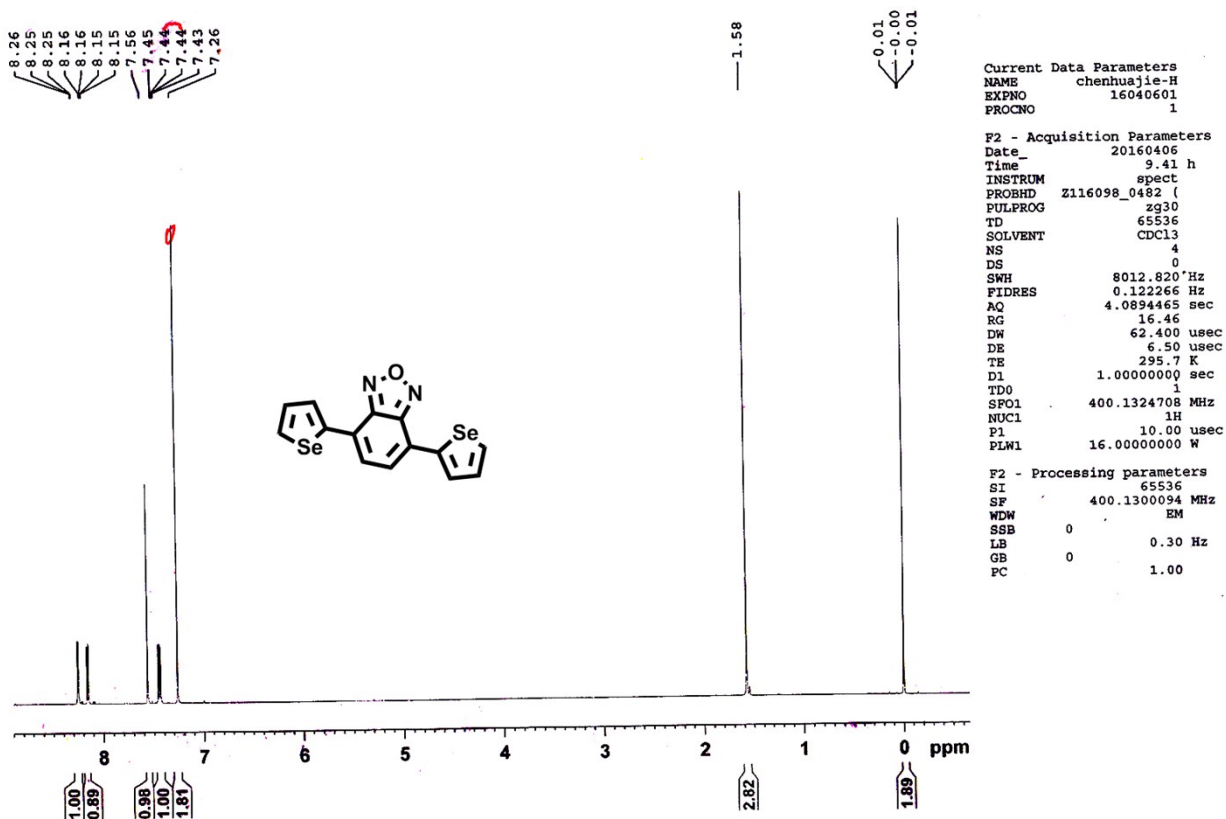

Figure S1.  $^1\text{H}$  NMR spectra of the compound 1.

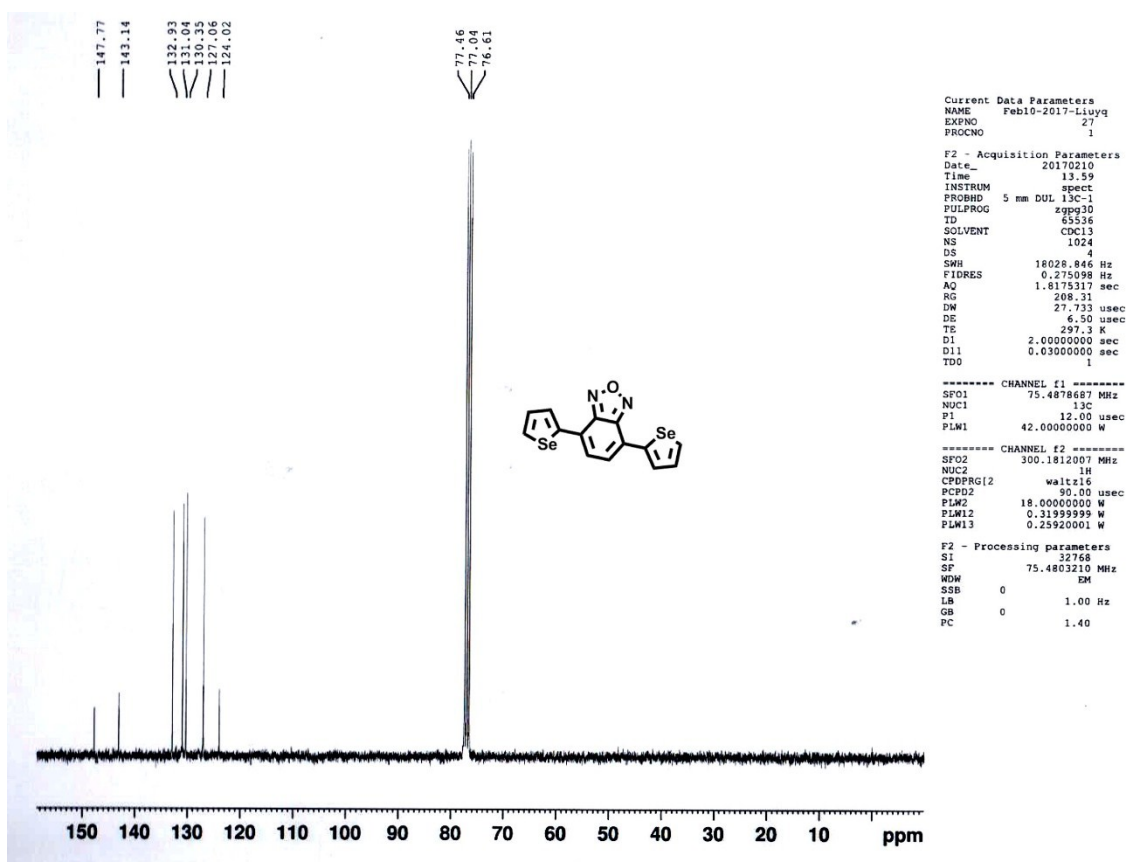

Figure S2.  $^{13}\text{C}$  NMR spectra of the compound 1.

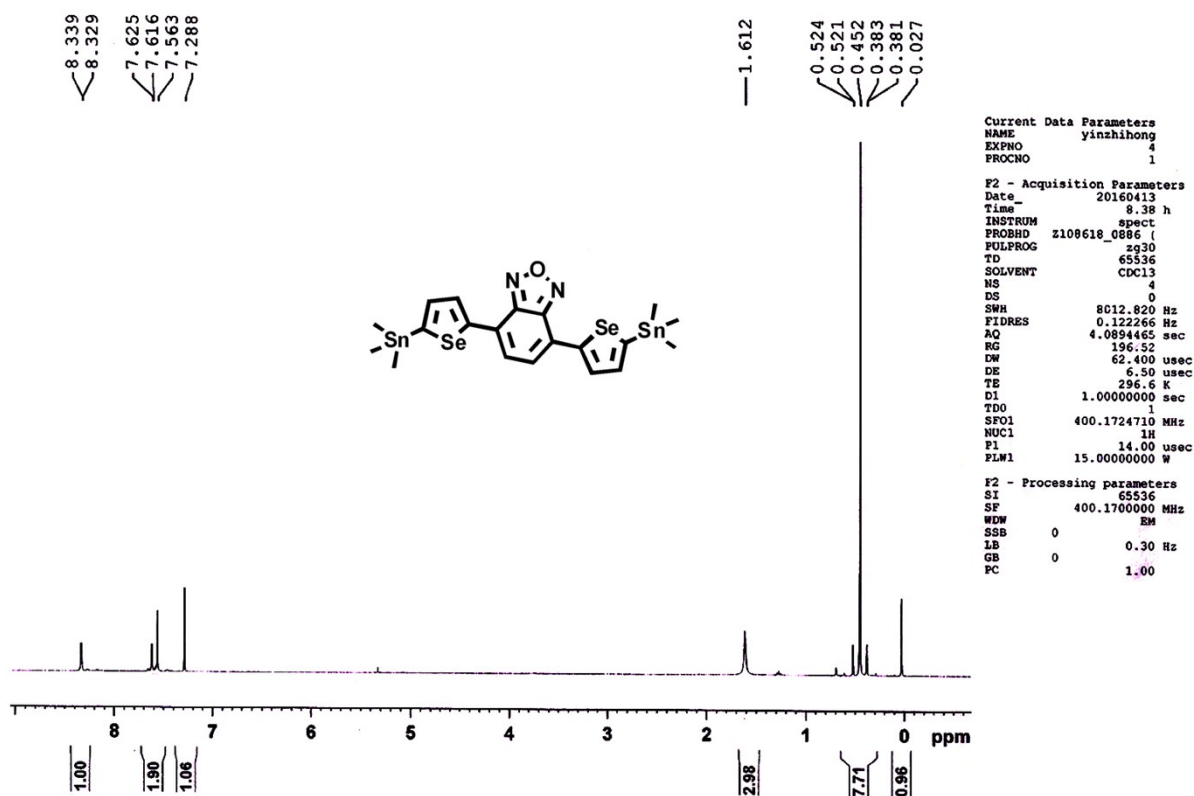

Figure S3. <sup>1</sup>H NMR spectra of the monomer M1.

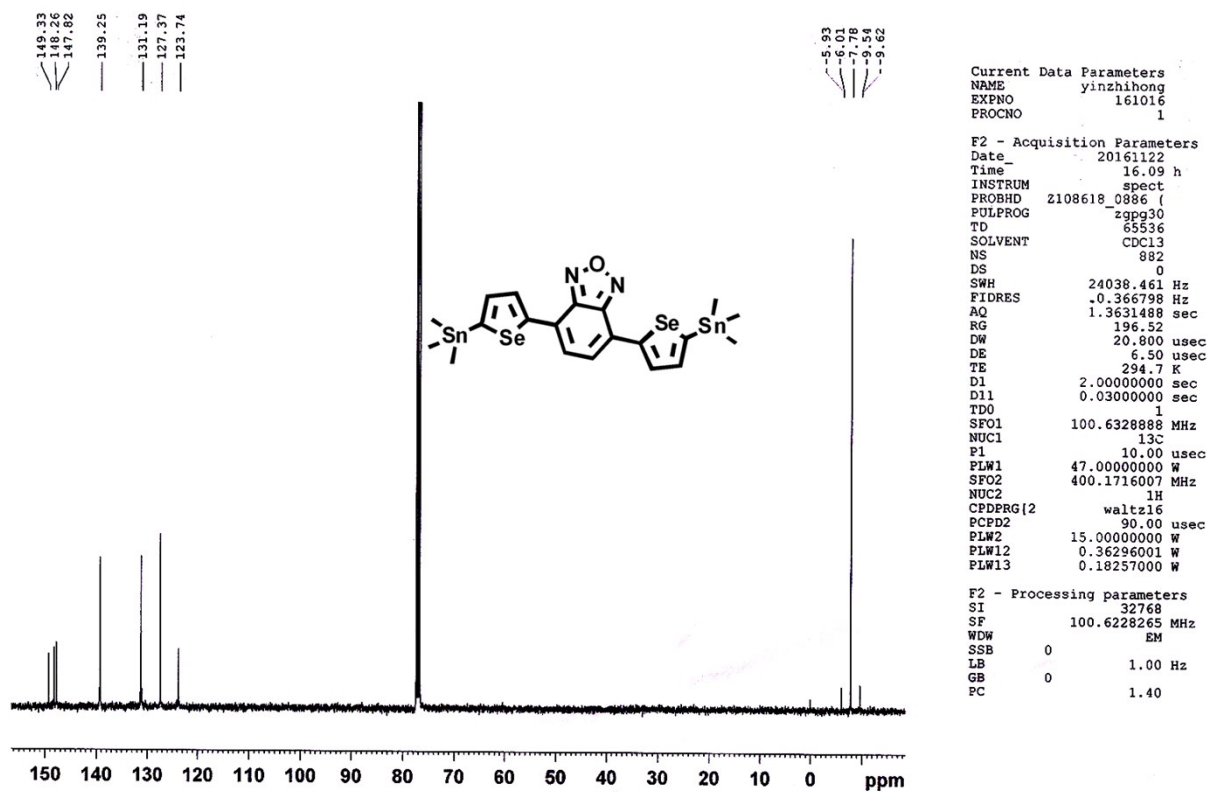

Figure S4. <sup>13</sup>C NMR spectra of the monomer M1.

# MALDI, Y1, 20170210

## Analysis Info

Analysis Name D:\Data\MALDI\2017\0210\Y1\_0\_I7\_000004.d  
Method MALDI\_P\_100-3000  
Sample Name  
Comment

Acquisition Date 2/10/2017 3:20:05 PM

Operator  
Instrument solariX

## Acquisition Parameter

|                       |           |                      |           |                       |                          |
|-----------------------|-----------|----------------------|-----------|-----------------------|--------------------------|
| Acquisition Mode      | Single MS | Acquired Scans       | 3         | Calibration Date      | Fri Feb 10 03:16:35 2017 |
| Polarity              | Positive  | No. of Cell Fills    | 1         | Data Acquisition Size | 2097152                  |
| Broadband Low Mass    | 202.1 m/z | No. of Laser Shots   | 10        | Data Processing Size  | 4194304                  |
| Broadband High Mass   | 600.0 m/z | Laser Power          | 31.2 lp   | Apodization           | Sine-Bell Multiplication |
| Source Accumulation   | 0.001 sec | Laser Shot Frequency | 0.020 sec |                       |                          |
| Ion Accumulation Time | 0.300 sec |                      |           |                       |                          |

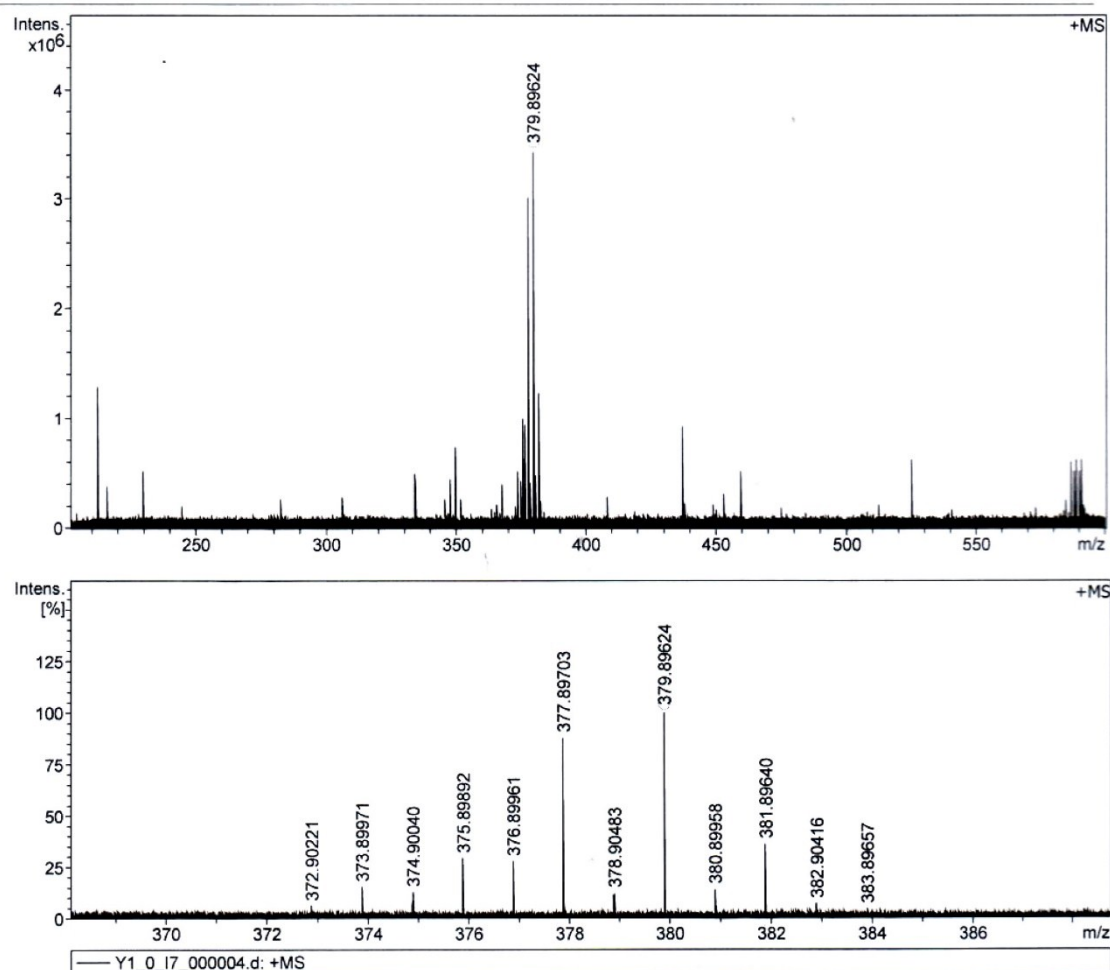

| Meas. m/z  | # | Ion Formula                                                    | Score  | m/z        | err [ppm] | Mean err [ppm] | mSigma | rdb  | e <sup>-</sup> Conf | N-Rule |
|------------|---|----------------------------------------------------------------|--------|------------|-----------|----------------|--------|------|---------------------|--------|
| 379.896236 | 1 | C <sub>14</sub> H <sub>8</sub> N <sub>2</sub> OSe <sub>2</sub> | 100.00 | 379.896427 | 0.5       | 0.6            | 72.1   | 12.0 | odd                 | ok     |

Figure S5. High-resolution mass spectrum of the compound 1.

# MALDI, YM1, 20170210

## Analysis Info

Analysis Name D:\Data\MALDI\20170210\YM1\_0\_I8\_000002.d  
 Method MALDI\_P\_100-3000  
 Sample Name  
 Comment

Acquisition Date 2/10/2017 3:24:05 PM

Operator  
 Instrument solariX

## Acquisition Parameter

|                       |            |                      |           |                       |                          |
|-----------------------|------------|----------------------|-----------|-----------------------|--------------------------|
| Acquisition Mode      | Single MS  | Acquired Scans       | 13        | Calibration Date      | Fri Feb 10 03:16:35 2017 |
| Polarity              | Positive   | No. of Cell Fills    | 1         | Data Acquisition Size | 2097152                  |
| Broadband Low Mass    | 202.1 m/z  | No. of Laser Shots   | 10        | Data Processing Size  | 4194304                  |
| Broadband High Mass   | 1300.0 m/z | Laser Power          | 39.4 lp   | Apodization           | Sine-Bell Multiplication |
| Source Accumulation   | 0.001 sec  | Laser Shot Frequency | 0.020 sec |                       |                          |
| Ion Accumulation Time | 0.300 sec  |                      |           |                       |                          |

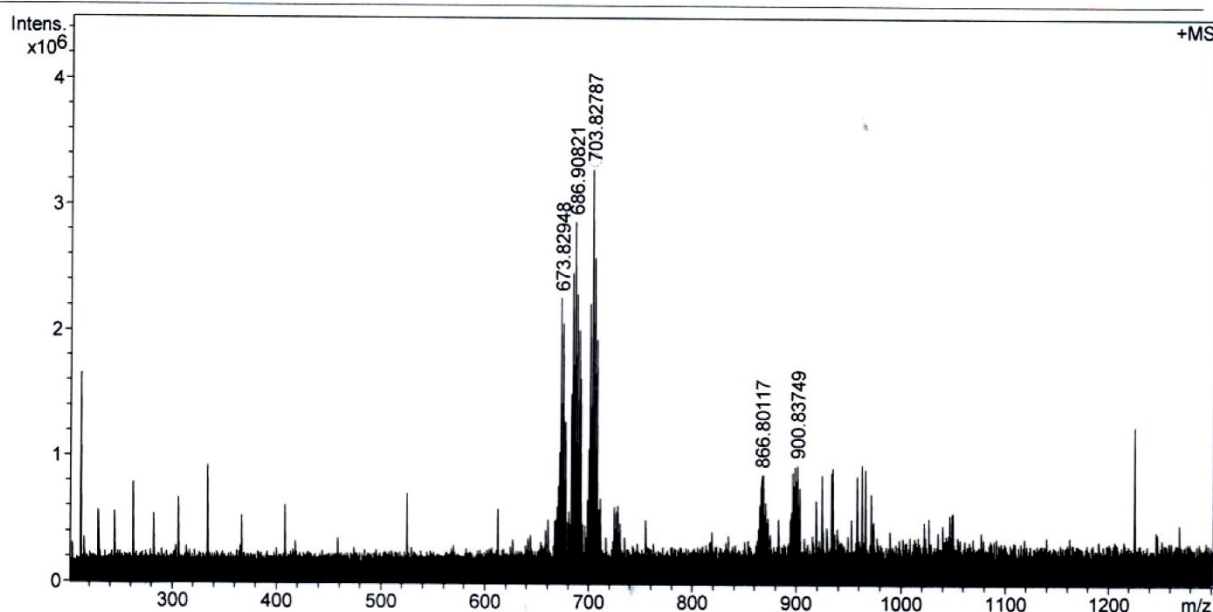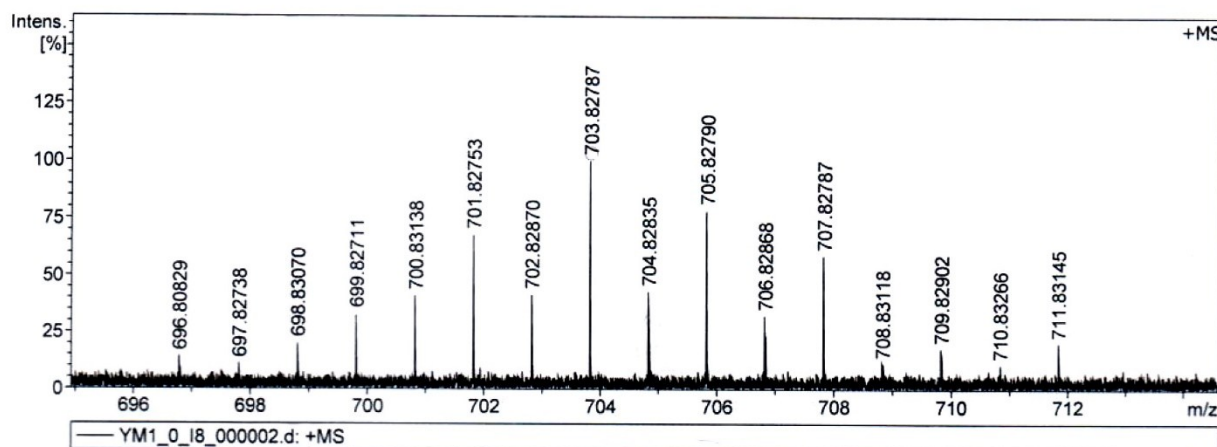

| Meas. m/z  | # | Ion Formula                                                                     | Score  | m/z        | err [ppm] | Mean err [ppm] | mSigma | rdb  | e <sup>-</sup> Conf | N-Rule |
|------------|---|---------------------------------------------------------------------------------|--------|------------|-----------|----------------|--------|------|---------------------|--------|
| 703.827871 | 1 | C <sub>20</sub> H <sub>24</sub> N <sub>2</sub> OSe <sub>2</sub> Sn <sub>2</sub> | 100.00 | 703.827321 | -0.8      | -0.6           | 122.6  | 12.0 | odd                 | ok     |

Figure S6. High-resolution mass spectrum of the monomer M1.
